# Supplementary material for: Acute head-fixed recordings in awake mice with multiple Neuropixels probes
Source: Springer Nature journal article supplement (doi:10.1038/s41596-022-00768-6), 2022-12-07
Supplement: MOESM1 [file 41596_2022_768_MOESM1_ESM28.pdf]

## Supplementary information

---

# Acute head-fixed recordings in awake mice with multiple Neuropixels probes

---

In the format provided by the authors and unedited

| Item                                                          | Product used in this protocol                                               | Approximate cost | Possible alternatives                                | Approximate cost of alternatives | Notes                                                                                                                                       |
|---------------------------------------------------------------|-----------------------------------------------------------------------------|------------------|------------------------------------------------------|----------------------------------|---------------------------------------------------------------------------------------------------------------------------------------------|
| Adhesive for animal skin                                      | Vetbond                                                                     | \$/mouse         | Ivoclar Adhese Universal, cyanoacrylate (super glue) | \$/mouse                         | Please test alternatives carefully before using                                                                                             |
| Cement for headframe attachment                               | C&B Metabond                                                                | \$\$/mouse       | Ivoclar Tetric EvoFlow                               | \$/mouse                         | Please test alternatives carefully before using                                                                                             |
| Headframe                                                     | Machined titanium with 30 degree bend (cite Groblewski et al.)              | \$\$\$ /mouse    | Straight piece of steel                              | \$/mouse                         | Successful application of Procedure 2 requires repeatable headframe alignment, which may be difficult to achieve with alternative designs   |
| Headframe well                                                | Custom 3D-printed design                                                    | \$\$/mouse       | Rubber "O" ring                                      | \$/mouse                         | An alternative well will make it more difficult to align the insertion window – only use this option if you don't require precise targeting |
| Glass coverslip                                               | Custom milled from TowerOptical                                             | \$\$\$ /mouse    | 2-3 round coverslips with optical glue               | \$/mouse                         | The less expensive alternative is described in this protocol                                                                                |
| Coverslip coating                                             | Sylgard 184 Silicone                                                        | \$/mouse         | No coating                                           | Free                             | The small bleeds caused using uncoated glass can be stopped quickly by an experienced surgeon                                               |
| Adhesive for glass coverslip                                  | Vetbond                                                                     | \$\$/mouse       | Cyanoacrylate adhesives (super glue)                 | \$/mouse                         | Please test alternatives carefully before using                                                                                             |
| Polymer to cover edges of window and exposed glue             | Kwik-Cast                                                                   | \$\$/mouse       | Smooth-On Body Double "Fast Set"                     | \$/mouse                         | Please test alternatives carefully before using                                                                                             |
| Adhesive for plastic window                                   | Metabond                                                                    | \$\$/mouse       | Many alternative glues, cements and polymers         | \$/mouse                         |                                                                                                                                             |
| Brain stabilization compound                                  | Mix of low melting temp agarose from BioRad and high EEO agarose from Sigma | \$\$\$ /mouse    | Standard agar powder                                 | \$/mouse                         | Alternatives we tested all had decreased clarity and/or stability                                                                           |
| Cap for protecting the coverslip or brain between experiments | Custom 3D printed design                                                    | \$\$/mouse       | Recycled plastic and tape                            | Free                             |                                                                                                                                             |

**Supplementary Table 1: Approximate cost and possible alternatives for key consumable supplies.** Note that the use of alternatives may require slight modifications to the exact steps presented in this protocol. Any substitutions should be made with caution including adequate preparation and testing. Also note that the cost scale is different from Supplementary Table 2, as the items in this table typically cannot be reused for multiple experiments. In both cases, costs are relative, ballpark values and will inevitably change over time.

| Item                                         | Product used in this protocol                               | Approximate cost | Possible alternatives                                                                                                                                                              | Approximate cost of alternatives | Notes                                                                                                                                     |
|----------------------------------------------|-------------------------------------------------------------|------------------|------------------------------------------------------------------------------------------------------------------------------------------------------------------------------------|----------------------------------|-------------------------------------------------------------------------------------------------------------------------------------------|
| <b>Stereotaxic frame</b>                     | Kopf Model 1900                                             | \$\$\$\$         | Kopf Model 900, or purchase used                                                                                                                                                   | \$\$\$                           | Stereotaxic frames are a standard surgical tool and can be shared across multiple labs                                                    |
| <b>Manual manipulator for surgery</b>        | Kopf Model 1760                                             | \$\$             | Place headframe and glass coverslip by hand                                                                                                                                        | Free                             | Many surgical stations already include a manual manipulator for performing injections                                                     |
| <b>Headframe holder</b>                      | Custom machined 27.5 degree angled holder (cite Groblewski) | \$\$\$           | Thorlabs parts                                                                                                                                                                     | \$                               | Successful application of Procedure 2 requires repeatable headframe alignment, which may be difficult to achieve with alternative designs |
| <b>Parts for precise head post placement</b> | Custom machined design (cite Groblewski)                    | \$\$\$           | Place headframe by hand                                                                                                                                                            | Free                             |                                                                                                                                           |
| <b>Silicon probes</b>                        | Neuropixels                                                 | \$\$\$           | NeuroNexus, Cambridge NeuroTech, Atlas Neuroengineering, others                                                                                                                    | \$\$\$                           | The cost of alternative probes is similar, but may not require a new purchase                                                             |
| <b>Manipulators for probes</b>               | New Scale Linear Smart Stages                               | \$\$\$\$         | Manual manipulators                                                                                                                                                                | \$\$                             | Manual manipulators make it difficult to insert probes slowly                                                                             |
| <b>Rig structure and manipulator mounts</b>  | Custom machined metal components                            | \$\$\$\$         | Thorlabs parts/3d printed mounts, e.g. International Brain Laboratory rig design ( <a href="https://elifsciences.org/articles/63711">https://elifsciences.org/articles/63711</a> ) | \$\$                             |                                                                                                                                           |
| <b>Microscope</b>                            | Leica M80                                                   | \$\$\$           | AmScope 3.5X-90X Stereo Zoom Microscope                                                                                                                                            | \$\$                             |                                                                                                                                           |
| <b>Tail guard</b>                            | Custom 3D-printed design                                    | \$\$             | Recycled plastic and tape                                                                                                                                                          | Free                             |                                                                                                                                           |

**Supplementary Table 2: Approximate cost and possible alternatives for key non-consumable supplies.** Note that alternatives may require slight modifications to the exact steps presented here. Any substitutions should be made with caution including adequate preparation and testing. Please note that the cost scale is different from Supplementary Table 1, as these items can be reused across many experiments. In both cases, costs are relative, ballpark values and will inevitably change over time.
